# Supplementary material
Source: PubMed Central journal article supplement (PMC9969356)
Supplement: NIHMS1872628-supplement-4.pdf [file NIHMS1872628-supplement-4.pdf]

Supplemental Table 1. Sensitivity analyses of mortality among workers with a claim for low back sprain or strain (1998-2015, West Virginia Referent Rates)<sup>a</sup>

|                       | Single claim (N=11,571) |      |           | First claim for low back sprain or strain only <sup>b</sup> (N=8,175) |      |           | Over 95% of county white <sup>c</sup> (N=7,766) |      |           |
|-----------------------|-------------------------|------|-----------|-----------------------------------------------------------------------|------|-----------|-------------------------------------------------|------|-----------|
|                       | OBS                     | SMR  | 95% CI    | OBS                                                                   | SMR  | 95% CI    | OBS                                             | SMR  | 95% CI    |
| All deaths            | 1192                    | 0.96 | 0.90-1.01 | 726                                                                   | 0.87 | 0.81-0.94 | 729                                             | 0.88 | 0.82-0.94 |
| All cancers           | 310                     | 0.94 | 0.84-1.05 | 188                                                                   | 0.87 | 0.75-1.00 | 180                                             | 0.82 | 0.70-0.95 |
| Heart diseases        | 205                     | 0.84 | 0.73-0.96 | 128                                                                   | 0.80 | 0.66-0.95 | 127                                             | 0.78 | 0.65-0.93 |
| Intentional self-harm | 54                      | 1.18 | 0.88-1.53 | 30                                                                    | 0.91 | 0.61-1.30 | 41                                              | 1.30 | 0.93-1.76 |
| Accidental poisoning  | 92                      | 1.56 | 1.26-1.91 | 59                                                                    | 1.36 | 1.03-1.75 | 61                                              | 1.51 | 1.16-1.94 |

OBS, observed number of deaths; SMR, standardized mortality ratio; CI, confidence interval

<sup>a</sup>International Classification of Diseases (ICD) codes were mapped to all cancers, heart diseases, intentional self-harm, and accidental poisoning as described on the NIOSH website at <https://www.cdc.gov/niosh/ltras/pdf/NIOSH-119-table-2007.pdf>. ICD codes were mapped to drug overdose involving opioids as described in the methods section.

<sup>b</sup>First claim for low back sprain or strain was for low back sprain and/or strain only

<sup>c</sup>Over 95% of the claimant county was white only according to the 2000 census

Supplemental Table 2. Sensitivity analyses of adjusted hazard ratios for selected outcomes according to disability-related factors.<sup>a</sup>

|                                                                   | All deaths |           | All cancers |           | Heart diseases |           | Intentional self-harm |            | Drug overdoses involving opioids |            |
|-------------------------------------------------------------------|------------|-----------|-------------|-----------|----------------|-----------|-----------------------|------------|----------------------------------|------------|
|                                                                   | HR         | 95% CI    | HR          | 95% CI    | HR             | 95% CI    | HR                    | 95% CI     | HR                               | 95% CI     |
| <b>Cohort members with a single claim</b>                         |            |           |             |           |                |           |                       |            |                                  |            |
| Lost time                                                         | 1.44       | 1.26-1.65 | 1.36        | 1.04-1.77 | 1.45           | 1.04-2.01 | 2.19                  | 1.10-4.38  | 2.00                             | 1.20-3.33  |
| Weeks of lost time (per 100 weeks)                                | 1.24       | 1.11-1.38 | 1.01        | 0.80-1.28 | 1.34           | 1.04-1.71 | 1.46                  | 0.86-2.47  | 1.72                             | 1.18-2.52  |
| Permanent disability <sup>b</sup>                                 | 1.20       | 1.06-1.35 | 0.94        | 0.74-1.20 | 1.23           | 0.93-1.64 | 1.30                  | 0.74-2.30  | 2.14                             | 1.39-3.29  |
| Permanent partial disability (vs. no disability)                  | 1.20       | 1.06-1.36 | 0.93        | 0.73-1.19 | 1.23           | 0.92-1.64 | 1.26                  | 0.71-2.25  | 2.12                             | 1.37-3.27  |
| Permanent total disability (vs. no disability)                    | 1.05       | 0.58-1.93 | 1.26        | 0.46-3.40 | 1.35           | 0.41-4.37 | 3.39                  | 0.45-25.26 | 3.51                             | 0.48-25.77 |
| Percent permanent disability (per 10%)                            | 1.08       | 1.01-1.15 | 0.93        | 0.81-1.08 | 1.12           | 0.96-1.29 | 1.23                  | 0.91-1.66  | 1.44                             | 1.15-1.79  |
| Surgical treatment                                                | 0.94       | 0.58-1.55 | 0.42        | 0.11-1.70 | 0.96           | 0.31-2.99 | 1.54                  | 0.21-11.18 | 0                                | NC         |
| <b>First claim for low back sprain or strain only<sup>c</sup></b> |            |           |             |           |                |           |                       |            |                                  |            |
| Lost time                                                         | 1.42       | 1.20-1.67 | 1.64        | 1.17-2.31 | 1.72           | 1.14-2.58 | 1.91                  | 0.84-4.31  | 1.51                             | 0.87-2.63  |
| Weeks of lost time (per 100 weeks)                                | 1.47       | 1.19-1.81 | 1.24        | 0.80-1.91 | 1.26           | 0.74-2.12 | 2.63                  | 1.11-6.22  | 3.13                             | 1.82-5.37  |
| Permanent disability <sup>b</sup>                                 | 1.26       | 1.06-1.49 | 1.06        | 0.75-1.49 | 1.46           | 0.99-2.15 | 1.34                  | 0.57-3.20  | 2.51                             | 1.44-4.36  |
| Permanent partial disability (vs. no disability)                  | 1.26       | 1.06-1.49 | 1.06        | 0.75-1.50 | 1.46           | 0.99-2.15 | 1.35                  | 0.57-3.20  | 2.51                             | 1.44-4.36  |
| Permanent total disability (vs. no disability)                    | 0          | NC        | 0           | NC        | 0              | NC        | 0                     | NC         | 0                                | NC         |
| Percent permanent disability (per 10%)                            | 1.14       | 0.99-1.31 | 1.00        | 0.75-1.32 | 1.25           | 0.92-1.69 | 1.47                  | 0.74-2.90  | 2.02                             | 1.33-3.08  |
| Surgical treatment                                                | 0.83       | 0.35-2.02 | 0           | NC        | 2.25           | 0.70-7.23 | 0                     | NC         | 0                                | NC         |
| <b>Over 95% of county white<sup>d</sup></b>                       |            |           |             |           |                |           |                       |            |                                  |            |
| Lost time                                                         | 1.60       | 1.34-1.91 | 1.51        | 1.06-2.15 | 1.48           | 0.98-2.22 | 2.10                  | 0.97-4.59  | 1.85                             | 1.02-3.38  |
| Weeks of lost time (per 100 weeks)                                | 1.29       | 1.12-1.49 | 1.25        | 0.94-1.67 | 1.10           | 0.78-1.56 | 1.45                  | 0.78-2.71  | 1.68                             | 1.05-2.67  |
| Permanent disability <sup>b</sup>                                 | 1.41       | 1.20-1.64 | 1.23        | 0.90-1.68 | 1.07           | 0.74-1.55 | 1.25                  | 0.64-2.45  | 3.22                             | 1.92-5.42  |
| Permanent partial disability (vs. no disability)                  | 1.41       | 1.21-1.65 | 1.20        | 0.87-1.65 | 1.10           | 0.76-1.59 | 1.19                  | 0.60-2.36  | 3.26                             | 1.94-5.49  |
| Permanent total disability (vs. no disability)                    | 1.13       | 0.47-2.74 | 2.38        | 0.75-7.56 | 0              | NC        | 4.74                  | 0.63-35.82 | 0                                | NC         |

|                                           |      |           |      |           |      |           |      |           |      |           |
|-------------------------------------------|------|-----------|------|-----------|------|-----------|------|-----------|------|-----------|
| Percent permanent disability<br>(per 10%) | 1.14 | 1.04-1.24 | 1.11 | 0.94-1.31 | 1.02 | 0.83-1.26 | 1.21 | 0.85-1.73 | 1.38 | 1.05-1.82 |
| Surgical treatment                        | 0.81 | 0.38-1.71 | 0    | NC        | 1.69 | 0.54-5.35 | 0    | NC        | 0    | NC        |

HR, hazard ratio; CI, confidence interval; NC, not calculated as no cases exposed

<sup>a</sup>Models were adjusted for age (time scale) and for sex, and birth date ( $\pm 5$  years) by matching. The number of observed cases in these analyses ranged from 28 to 1295, depending on the death category, disability-related factor, and sensitivity analysis.

<sup>b</sup>Permanent partial or permanent total disability

<sup>c</sup>First claim for low back sprain or strain was for low back sprain and/or strain only

<sup>d</sup>Over 95% of the claimant county was white only according to the 2000 census

Supplemental Table 3. Mortality among workers with a claim for low back sprain or strain (1998-2015, West Virginia Referent Rates) by sex.<sup>a</sup>

|                       | Overall cohort (N=14,218) |      |           | Men (N=8,948) |      |           | Women (N=5,270) |      |           |
|-----------------------|---------------------------|------|-----------|---------------|------|-----------|-----------------|------|-----------|
|                       | OBS                       | SMR  | 95% CI    | OBS           | SMR  | 95% CI    | OBS             | SMR  | 95% CI    |
| All deaths            | 1,393                     | 0.92 | 0.87-0.97 | 960           | 0.89 | 0.83-0.95 | 433             | 0.99 | 0.90-1.09 |
| All cancers           | 353                       | 0.88 | 0.79-0.98 | 233           | 0.88 | 0.77-1.00 | 120             | 0.87 | 0.72-1.04 |
| Heart diseases        | 239                       | 0.80 | 0.70-0.91 | 177           | 0.78 | 0.67-0.90 | 62              | 0.88 | 0.68-1.13 |
| Intentional self-harm | 65                        | 1.14 | 0.88-1.45 | 57            | 1.15 | 0.87-1.49 | 8               | 1.08 | 0.47-2.13 |
| Accidental poisoning  | 119                       | 1.62 | 1.34-1.94 | 89            | 1.56 | 1.26-1.92 | 30              | 1.83 | 1.23-2.61 |

OBS, observed number of deaths; SMR, standardized mortality ratio; CI, confidence interval

<sup>a</sup>International Classification of Diseases (ICD) codes were mapped to all cancers, heart diseases, intentional self-harm, and accidental poisoning as described on the NIOSH website at <https://www.cdc.gov/niosh/ltas/pdf/NIOSH-119-table-2007.pdf>.

Supplemental Table 4. Adjusted hazard ratios (HRs) for selected outcomes according to disability-related factors by sex.<sup>a</sup>

|                                    | All deaths |           | All cancers |           | Heart diseases |           | Intentional self-harm |           | Drug overdoses involving opioids |           |
|------------------------------------|------------|-----------|-------------|-----------|----------------|-----------|-----------------------|-----------|----------------------------------|-----------|
|                                    | HR         | 95% CI    | HR          | 95% CI    | HR             | 95% CI    | HR                    | 95% CI    | HR                               | 95% CI    |
| Lost time                          |            |           |             |           |                |           |                       |           |                                  |           |
| All                                | 1.44       | 1.27-1.63 | 1.41        | 1.10-1.81 | 1.42           | 1.06-1.92 | 1.85                  | 1.02-3.37 | 1.89                             | 1.22-2.93 |
| Men                                | 1.44       | 1.24-1.67 | 1.32        | 0.98-1.79 | 1.23           | 0.88-1.73 | 2.14                  | 1.10-4.16 | 2.02                             | 1.21-3.37 |
| Women                              | 1.46       | 1.17-1.82 | 1.60        | 1.03-2.46 | 2.27           | 1.18-4.37 | 0.82                  | 0.20-3.42 | 1.53                             | 0.64-3.62 |
| Weeks of lost time (per 100 weeks) |            |           |             |           |                |           |                       |           |                                  |           |
| All                                | 1.27       | 1.14-1.41 | 1.05        | 0.84-1.32 | 1.35           | 1.06-1.71 | 1.53                  | 0.94-2.50 | 1.73                             | 1.23-2.44 |
| Men                                | 1.30       | 1.15-1.47 | 1.09        | 0.83-1.42 | 1.29           | 0.97-1.71 | 1.52                  | 0.89-2.58 | 1.78                             | 1.20-2.63 |

|                                                     |      |           |      |           |      |           |      |           |      |           |
|-----------------------------------------------------|------|-----------|------|-----------|------|-----------|------|-----------|------|-----------|
| Women                                               | 1.19 | 0.97-1.46 | 0.96 | 0.62-1.48 | 1.53 | 0.97-2.42 | 1.64 | 0.45-5.91 | 1.59 | 0.78-3.26 |
| Permanent disability <sup>b</sup>                   |      |           |      |           |      |           |      |           |      |           |
| All                                                 | 1.25 | 1.12-1.40 | 0.99 | 0.79-1.24 | 1.25 | 0.96-1.63 | 1.31 | 0.78-2.22 | 2.32 | 1.60-3.38 |
| Men                                                 | 1.20 | 1.05-1.38 | 0.90 | 0.68-1.19 | 1.12 | 0.82-1.53 | 1.42 | 0.81-2.49 | 2.44 | 1.59-3.75 |
| Women                                               | 1.36 | 1.11-1.66 | 1.20 | 0.82-1.77 | 1.70 | 1.02-2.84 | 0.75 | 0.15-3.71 | 1.99 | 0.92-4.30 |
| Permanent partial disability<br>(vs. no disability) |      |           |      |           |      |           |      |           |      |           |
| All                                                 | 1.25 | 1.12-1.40 | 0.98 | 0.78-1.23 | 1.25 | 0.95-1.63 | 1.28 | 0.75-2.18 | 2.31 | 1.59-3.37 |
| Men                                                 | 1.20 | 1.05-1.38 | 0.88 | 0.66-1.16 | 1.10 | 0.80-1.51 | 1.38 | 0.78-2.44 | 2.42 | 1.57-3.73 |
| Women                                               | 1.38 | 1.13-1.69 | 1.22 | 0.83-1.80 | 1.80 | 1.07-3.02 | 0.76 | 0.15-3.77 | 2.02 | 0.93-4.35 |
| Permanent total disability<br>(vs. no disability)   |      |           |      |           |      |           |      |           |      |           |
| All                                                 | 1.11 | 0.61-2.03 | 1.37 | 0.51-3.71 | 1.38 | 0.43-4.50 | 3.36 | 0.46-24.8 | 3.16 | 0.43-23.0 |
| Men                                                 | 1.36 | 0.73-2.55 | 1.62 | 0.60-4.38 | 1.89 | 0.60-5.99 | 3.91 | 0.53-29.1 | 4.13 | 0.56-30.4 |
| Women                                               | 0.36 | 0.05-2.64 | 0    | NC        | 0    | NC        | 0    | NC        | 0    | NC        |
| Percent permanent disability<br>(per 10%)           |      |           |      |           |      |           |      |           |      |           |
| All                                                 | 1.10 | 1.03-1.17 | 0.97 | 0.85-1.11 | 1.13 | 0.98-1.31 | 1.27 | 0.96-1.68 | 1.40 | 1.14-1.71 |
| Men                                                 | 1.10 | 1.02-1.19 | 1.00 | 0.86-1.17 | 1.11 | 0.94-1.31 | 1.23 | 0.91-1.67 | 1.41 | 1.12-1.77 |
| Women                                               | 1.10 | 0.97-1.24 | 0.89 | 0.67-1.17 | 1.22 | 0.92-1.61 | 1.51 | 0.75-3.03 | 1.37 | 0.89-2.12 |
| Surgical treatment                                  |      |           |      |           |      |           |      |           |      |           |
| All                                                 | 0.90 | 0.55-1.48 | 0.40 | 0.10-1.61 | 0.92 | 0.29-2.87 | 1.46 | 0.20-10.6 | 0    | NC        |
| Men                                                 | 0.77 | 0.41-1.44 | 0.28 | 0.04-1.98 | 0.40 | 0.06-2.84 | 0    | NC        | 0    | NC        |
| Women                                               | 1.26 | 0.56-2.82 | 0.73 | 0.10-5.20 | 2.67 | 0.65-11.0 | 14.8 | 1.80-121  | 0    | NC        |

HR, hazard ratio; CI, confidence interval; NC, not calculated as no cases exposed

<sup>a</sup>All models were adjusted for age (time scale) and for birth date ( $\pm 5$  years) by matching. Models for all claimants were also adjusted for sex by matching. The number of observed cases in these analyses ranged from 8 to 1295, depending on the claimant's sex, death category, and disability-related factor in the model.

<sup>b</sup>Permanent partial or permanent total disability

Supplemental Table 1. Sensitivity analyses of mortality among workers with a claim for low back sprain or strain (1998-2015, West Virginia Referent Rates).

Supplemental Table 2. Sensitivity analyses of adjusted hazard ratios for selected outcomes according to disability-related factors.

Supplemental Table 3. Mortality among workers with a claim for low back sprain or strain (1998-2015, West Virginia Referent Rates) by sex.

Supplemental Table 4. Adjusted hazard ratios (HRs) for selected outcomes according to disability-related factors by sex.

Supplemental Figure 1: Splines depicting mortality over time in the overall cohort from the date of injury for deaths caused by international self-harm and opioid overdoses.

Supplemental Figure 2: Splines depicting the hazard ratio of lost-time vs no lost-time over time in the overall cohort from the date of injury for overall mortality, deaths from cancer, heart disease, and opioids. A p-value testing the proportional hazard assumption is included in the bottom right corner for each outcome.

Supplemental Figure 3: Kaplan-Meier survival curves and associated 95% confidence intervals for lost-time (solid line, pale curve) and no lost-time members (dotted line, dark curve) of the cohort for overall mortality and specific causes of death from the date of injury
